# Supplementary material for: Infliximab Limits Injury in Myocardial Infarction
Source: PubMed Central journal article supplement — J Am Heart Assoc. 2024 May 3;13(9):e032172. doi: 10.1161/JAHA.123.032172 (PMC11179902; doi:10.1161/jaha.123.032172), 2024-05-03
Supplement: JAH3-13-e032172-s004.pdf [file JAH3-13-e032172-s004.pdf]

# **SUPPLEMENTAL MATERIAL**

**Table S1. Top enriched gene function networks of the proteomic analysis from porcine coronary sinus blood obtained 3 days after MI.**

| Enriched function networks                   | Count | %     | p-value  | List Total | Pop Hits | Pop Total | Fold enrichment | Bonferroni p-value | Benjamini p-value | FDR      |
|----------------------------------------------|-------|-------|----------|------------|----------|-----------|-----------------|--------------------|-------------------|----------|
| Inflammatory response                        | 52    | 16.25 | 5.55E-29 | 318        | 379      | 16792     | 7.245           | 1.45E-25           | 1.45E-23          | 9.84E-26 |
| Cell-Cell signaling                          | 44    | 13.75 | 1.15E-28 | 318        | 254      | 16792     | 9.147           | 3.01E-25           | 1.5E-25           | 2.04E-25 |
| Positive regulation of cell proliferation    | 54    | 16.86 | 1.70E-26 | 318        | 466      | 16792     | 6.119           | 4.45E-23           | 1.11E-23          | 3.01E-23 |
| Monocyte chemotaxis                          | 22    | 6.86  | 1.19E-25 | 318        | 42       | 16792     | 27.660          | 3.11E-22           | 6.21E-23          | 2.11E-22 |
| Cellular response to TNF                     | 24    | 7.5   | 6.21E-18 | 318        | 110      | 16792     | 11.521          | 1.62E-14           | 1.35E-15          | 1.10E-14 |
| Neutrophil chemotaxis                        | 20    | 6.25  | 7.59E-18 | 318        | 66       | 16792     | 16.001          | 1.99E-14           | 1.53E-15          | 1.35E-14 |
| Cellular response to IL-1                    | 17    | 5.31  | 2.24E-13 | 318        | 71       | 16792     | 12.643          | 5.85E-10           | 2.93E-11          | 3.97E-10 |
| Lymphocyte chemotaxis                        | 12    | 3.75  | 1.47E-12 | 318        | 28       | 16792     | 22.631          | 3.85E-09           | 1.68E-10          | 2.61E-09 |
| Positive regulation of inflammatory response | 16    | 5     | 5.37E-12 | 318        | 73       | 16792     | 11.574          | 1.40E-08           | 5.40E-10          | 9.52E-09 |
| Negative regulation of angiogenesis          | 13    | 4.06  | 1.55E-09 | 318        | 62       | 16792     | 11.072          | 4.04E-06           | 1.12E-07          | 2.74E-06 |

MI, myocardial infarction; TNF, tumor necrosis factor; IL, interleukin; FDR, false detection rate

**Table S2. Network pathway genes.**

| Enriched function networks                   | Genes                                                                                                                                                                                                                                                                                                                                                                      |
|----------------------------------------------|----------------------------------------------------------------------------------------------------------------------------------------------------------------------------------------------------------------------------------------------------------------------------------------------------------------------------------------------------------------------------|
| Inflammatory response                        | RARRES2, S100A8, CXCR3, CXCL10, TNFRSF11B, TNFRSF11A, SERPINA3, SYK, KNG1, LTBR, IL27, ADGRE5, ACKR2, IL26, IL22, TNFAIP6, CCR7, PPBP, CCR4, CCR3, CCR2, NAIP, CCL1, TNFRSF21, CCL3, CSF1, CCL8, PF4, KIT, CCL5, CCL7, CCL26, CALCA, CCL24, TNFRSF1A, CCL22, CCL23, CCL20, ZAP70, THBS1, PTX3, CSF1R, BMP2, IL23R, CCL19, SMAD1, CCL15, EPHA2, CCL17, BMPR1B, IGFBP4, BMP6 |
| Cell-Cell signaling                          | FGF18, INSL3, NAMPT, CCL3, PPY, PGF, CTF1, CCL8, TSHB, FGF12, POMC, CCL5, CCL7, SHH, CCL26, TGFB2, CXCL10, NOV, CALCA, CCL24, CCL22, TNFRSF11A, CCL23, CCL20, CTGF, LTB, FGFBP1, IL3, BMP3, BMP2, AVP, NTF3, ADGRE5, IL26, CCL15, IL22, CCL17, TNFAIP6, CD80, EREG, PYY, GDF15, MERTK, XCL1                                                                                |
| Positive regulation of cell proliferation    | NAMPT, FGF18, FGF8, PDGFB, PGF, CXCR3, PDX1, FER, GDNF, SHH, IL31RA, TGFB2, CXCL10, EPCAM, TNFRSF11A, CTGF, NRG1, FGF2, MATK, AVP, CST3, DLL1, IL6R, OSM, VEGFD, EREG, PROK1, F2, ERBB4, CTF1, CSF1, KIT, CALR, LIF, IGF1R, KRAS, PTK2B, THBS1, EGF, FGFBP1, CSF1R, IL3, FLT1, TNFSF4, NTF3, TGFB1, TGFB2, IGF1, KDR, LEP, NOTCH1, SFRP1, HBEGF, FABP1                     |
| Monocyte chemotaxis                          | CCL1, CCL3, FLT1, LGALS3, PDGFB, CCL19, CCL8, CX3CL1, IL6R, CCL5, CCL15, CCL7, CCL26, CCL17, CCL24, CALCA, CCL22, CCL23, TNFRSF11A, TNFSF11, CCL20, XCL1                                                                                                                                                                                                                   |
| Cellular response to TNF                     | CCL1, TNFRSF21, ICAM1, CCL3, ADAMTS13, CCL19, CCL8, CX3CL1, CCL5, CCL15, CCL7, CCL26, CCL17, CCL24, VCAM1, CALCA, CCL22, APOB, CCL23, SFRP1, CCL20, HAMP, THBS1, XCL1                                                                                                                                                                                                      |
| Neutrophil chemotaxis                        | CCL1, CCL3, S100A8, LGALS3, CCL8, CX3CL1, CCL5, CCL15, CCL7, CCL26, CCL17, TGFB2, CCL24, CCL22, CCL23, PPBP, CCL20, TREM1, XCL1, SYK                                                                                                                                                                                                                                       |
| Cellular response to IL-1                    | CCL1, ICAM1, CCL3, CCL19, CCL8, CX3CL1, CCL5, CCL15, CCL7, CCL26, CCL17, CCL24, CCL22, CCL23, CCL20, SFRP1, XCL1                                                                                                                                                                                                                                                           |
| Lymphocyte chemotaxis                        | CCL24, CCL1, CCL22, CCL3, CCL23, CCL20, CCL8, CCL19, CX3CL1, CCL15, CCL26, CCL17                                                                                                                                                                                                                                                                                           |
| Positive regulation of inflammatory response | CCL1, CCL3, TNFSF4, S100A8, CCL8, CX3CL1, CCL5, CCL15, CCL7, CCL26, CCL24, TNFRSF1A, CCL23, CCR2, HSPD1, XCL1                                                                                                                                                                                                                                                              |
| Negative regulation of angiogenesis          | GDF2, SERPINF1, CCR2, APOH, PF4, CXCR3, TIE1, DCN, SPARC, THBS1, EPHA2, CXCL10, ANGPT4                                                                                                                                                                                                                                                                                     |

Figure S1. Antibody array target list.

| Number | Name            | Number | Name           | Number | Name               | Number | Name            | Number | Name         | Number | Name            | Number | Name               |
|--------|-----------------|--------|----------------|--------|--------------------|--------|-----------------|--------|--------------|--------|-----------------|--------|--------------------|
| 1      | ACK1            | 74     | DNF alpha      | 147    | FGF-18             | 220    | IGFBP-4         | 295    | IL-2 R       | 366    | MMP-14          | 439    | SH-PT              |
| 2      | Activin A       | 75     | FB             | 148    | FGF-20             | 221    | IGFBP-6         | 294    | IL-23 R      | 367    | MMP-25          | 440    | SPARC              |
| 3      | Activin B       | 76     | CRIM 1         | 149    | FGF-21             | 222    | IGFBP-ep2       | 295    | IL-23        | 368    | MusK            | 441    | Spinesin           |
| 4      | Activin C       | 77     | Cripto-1       | 150    | FGF-23             | 223    | IGF-I           | 296    | IL-23 R      | 369    | MSH             | 442    | TAC1               |
| 5      | Activin R1A     | 78     | CRTH-2         | 151    | PLRG               | 224    | IGF-I R         | 297    | IL-24        | 370    | MICA            | 443    | TarC               |
| 6      | Activin R1B     | 79     | Cryptic        | 152    | Fib-3 Ligand       | 225    | IGF-II          | 298    | IL-26        | 371    | NAP-2           | 444    | TCR                |
| 7      | EYA2            | 80     | CTACK          | 153    | Follistatin        | 226    | IGF-II R        | 299    | IL-27        | 372    | NCAM-1          | 445    | TECK               |
| 8      | Activin R1IA    | 81     | CTGF           | 154    | Follistatin-like 1 | 227    | IL-1 alpha      | 300    | IL-28A       | 373    | Neurin          | 446    | TRP1               |
| 9      | Adiponectin     | 82     | CTLA-4         | 155    | Fractalkine        | 228    | IL-1 beta       | 301    | IL-29        | 374    | NeuroD1         | 447    | TGF-alpha          |
| 10     | AgRP            | 83     | CV-2           | 156    | Frizzled-1         | 229    | IL-1 F5         | 302    | IL-31        | 375    | Neuropilin-2    | 448    | TGF-beta 1         |
| 11     | ALCAM           | 84     | CXCL14         | 157    | Frizzled-3         | 230    | IL-1 F6         | 303    | IL-31 RA     | 376    | Neurturin       | 449    | TGF-beta 2         |
| 12     | Angiogenin      | 85     | CXCL16         | 158    | Frizzled-4         | 231    | IL-1 F7         | 304    | BACE-1       | 377    | NGF R           | 450    | TGF-beta 3         |
| 13     | Angiopoietin-1  | 86     | CXCR1          | 159    | Frizzled-5         | 232    | IL-1 F8         | 305    | FACK         | 378    | NOV             | 451    | ATP2B1             |
| 14     | Angiopoietin-2  | 87     | CXCR2          | 160    | Frizzled-6         | 233    | IL-1 F9         | 306    | Insulin      | 379    | GGF2            | 452    | TGF-beta R1        |
| 15     | Angiopoietin-4  | 88     | CXCR3          | 161    | Frizzled-7         | 234    | IL-1 F10        | 307    | Insulin R    | 380    | Nidogen-1       | 453    | TGF-beta RII       |
| 16     | ANGPT1          | 89     | CXCR4          | 162    | Galectin-9         | 235    | IL-1 R3         | 308    | Insulysin    | 381    | NrCam           | 454    | GRI2               |
| 17     | ANGPT2          | 90     | CXCR5          | 163    | GASP-1             | 236    | IL-1 RA         | 309    | IP-10        | 382    | NG2             | 455    | TGF-beta RIII      |
| 18     | ANGPT3          | 91     | CXCR6          | 164    | GASP-2             | 237    | IL-1 R6         | 310    | I-TAC        | 383    | NRG3            | 456    | Thrombospondin     |
| 19     | Angiotensin     | 92     | D6             | 165    | GCP-2              | 238    | IL-1 R8         | 311    | Kininogen    | 384    | NT-3            | 457    | Thyroid Peroxidase |
| 20     | APJ             | 93     | DAN            | 166    | GCSF               | 239    | IL-1 R9         | 312    | Kremen-1     | 385    | NT-4            | 458    | Thrombospondin-1   |
| 21     | Amphiregulin    | 94     | DANCE          | 167    | G-CSF R            | 240    | IL-1 ra         | 313    | Kremen-2     | 386    | Orexin A        | 459    | Thrombospondin-2   |
| 22     | APRIL           | 95     | DCR3           | 168    | GDF1               | 241    | IL-1 R1         | 314    | Lck          | 387    | Orexin B        | 460    | Thrombospondin-4   |
| 23     | Artemin         | 96     | Decorin        | 169    | GDF3               | 242    | IL-1 RII        | 315    | LTBP1        | 388    | OSM             | 461    | Thymospondin       |
| 24     | Ar              | 97     | DNA-1          | 170    | GDF5               | 243    | IL-2            | 316    | LRP          | 389    | Osteonectin     | 462    | Tie-1              |
| 25     | BT-1            | 98     | DNA-3          | 171    | GDF8               | 244    | IL-2 R alpha    | 317    | LECT2        | 390    | Dibecoron       | 463    | Tie-2              |
| 26     | BAFF R          | 99     | DNA-4          | 172    | GDF9               | 245    | IL-2 R beta     | 318    | Lefty-A      | 391    | Osteoprotegerin | 464    | TIMP-1             |
| 27     | BCMA            | 100    | DNA            | 173    | GDF11              | 246    | IL-2 R gamma    | 319    | Leptin B     | 392    | OXA0 Ligand     | 465    | TIMP-2             |
| 28     | BD-1            | 101    | DR6            | 174    | GDF15              | 247    | IL-3            | 320    | Leptin       | 393    | PABC            | 466    | TIMP-3             |
| 29     | BDNF            | 102    | Dlx            | 175    | GDNF               | 248    | IL-3 R alpha    | 321    | LFA-1 alpha  | 394    | PD-ECGF         | 467    | TIMP-4             |
| 30     | beta-Catenin    | 103    | EDA-A2         | 176    | GFR alpha-1        | 249    | IL-4            | 322    | LIF          | 395    | PDGF R alpha    | 468    | DEFA5              |
| 31     | Bcl-1           | 104    | EDAR           | 177    | GFR alpha-2        | 250    | IL-4 R          | 323    | LIF R alpha  | 396    | PDGF R beta     | 469    | TSP1               |
| 32     | beta-NGF        | 105    | EDG-1          | 178    | GFR alpha-3        | 251    | IL-5            | 324    | LIGHT        | 397    | PDGF-AA         | 470    | TLR2               |
| 33     | Bcl-2           | 106    | EGF            | 179    | GFR alpha-4        | 252    | IL-5 R alpha    | 325    | Lipocalin-1  | 398    | PDGF-AB         | 471    | TLR3               |
| 34     | Bcl-3           | 107    | EGF R          | 180    | GITR               | 253    | IL-6            | 326    | LRP-1        | 399    | PDGF-BB         | 472    | TLR4               |
| 35     | BMP-2           | 108    | EG-VEGF        | 181    | GITR Ligand        | 254    | IL-6 R          | 327    | LRP-6        | 400    | PDGF-C          | 473    | TMEFF1             |
| 36     | BMP-3           | 109    | EMAP-II        | 182    | CBR1               | 255    | IL-7            | 328    | L-selectin   | 401    | PDGF-D          | 474    | TMEFF2             |
| 37     | BMP-3b          | 110    | ENA-78         | 183    | Glut1              | 256    | IL-7 R alpha    | 329    | Lipocalin-2  | 402    | PEGAM-1         | 475    | TNF-alpha          |
| 38     | BMP-4           | 111    | Endocan        | 184    | Glut2              | 257    | IL-8            | 330    | Lymphotactin | 403    | Pentraxin3      | 476    | TNF-beta           |
| 39     | BMP-5           | 112    | Endoglin       | 185    | Glut3              | 258    | IL-9            | 331    | LTB          | 404    | Persephin       | 477    | TNF R1             |
| 40     | BMP-6           | 113    | Endostatin     | 186    | Glut5              | 259    | IL-10           | 332    | LTBR         | 405    | PF4             | 478    | TNF RII            |
| 41     | BMP-7           | 114    | EN-RAGE        | 187    | Glypican 3         | 260    | IL-10 R alpha   | 333    | MAC-1        | 406    | PIGF            | 479    | TRADD              |
| 42     | BMP-8           | 115    | Entaxin        | 188    | Glypican 5         | 261    | IL-10 R beta    | 334    | MCP-1        | 407    | PLUNC           | 480    | TRAIL              |
| 43     | BMP-15          | 116    | Entaxin-2      | 189    | GM-CSF             | 262    | IL-11           | 335    | MCP-2        | 408    | Pref-1          | 481    | TRAIL R1           |
| 44     | BMPRI-IA        | 117    | Entaxin-3      | 190    | GM-CSF R alpha     | 263    | IL-12 p40       | 336    | MCP-3        | 409    | Progranulin     | 482    | TRAIL R2           |
| 45     | BMPRI-IB        | 118    | Epregrulin     | 191    | Granzyme A         | 264    | IL-12 p70       | 337    | MCP-4        | 410    | Prolactin       | 483    | TRAIL R3           |
| 46     | BMPRI-III       | 119    | ErbB2          | 192    | GREMLIN            | 265    | IL-12 R beta 1  | 338    | MA-CSF       | 411    | P-selectin      | 484    | TRAIL R4           |
| 47     | BTC             | 120    | ErbB3          | 193    | GRO                | 266    | IL-12 R beta 2  | 339    | MA-CSF R     | 412    | RAGE            | 485    | TRAMP              |
| 48     | Cardiotrophin-1 | 121    | ErbB4          | 194    | GRO-a              | 267    | IL-13           | 340    | MDC          | 413    | RANK            | 486    | TREM-1             |
| 49     | CC14            | 122    | Erythropoietin | 195    | GRI                | 268    | IL-13 R alpha 1 | 341    | MFG-E8       | 414    | RANTES          | 487    | TRCV               |
| 50     | CC18            | 123    | E-selectin     | 196    | GRII               | 269    | IL-13 R alpha 2 | 342    | MFRP         | 415    | RELM beta       | 488    | TSG-6              |
| 51     | CCR1            | 124    | Endostatin     | 197    | HR-EGF             | 270    | IL-15           | 343    | MIF          | 416    | RELT            | 489    | TSR P R            |
| 52     | CCR2            | 125    | FADD           | 198    | HCC-4              | 271    | IL-15 R alpha   | 344    | MIG          | 417    | ROBO4           | 490    | TWEAK              |
| 53     | CCR3            | 126    | FAM3B          | 199    | HCR                | 272    | IL-16           | 345    | MIP-1a       | 418    | \$100 AB/AB     | 491    | TWEAK R            |
| 54     | CCR4            | 127    | Fox            | 200    | Hepassocin         | 273    | IL-17           | 346    | MIP-1b       | 419    | \$100A10        | 492    | Ubiquitin+1        |
| 55     | CCR5            | 128    | Fas Ligand     | 201    | GLO-1              | 274    | IL-17B          | 347    | MIP-1d       | 420    | SAA             | 493    | uPA                |
| 56     | CCR6            | 129    | FGF Basic      | 202    | HGF                | 275    | IL-17B R        | 348    | MIP-2        | 421    | SCF             | 494    | uPAR               |
| 57     | CCR7            | 130    | FGF-8P         | 203    | HGFR               | 276    | IL-17C          | 349    | MIP-3 alpha  | 422    | SCF R           | 495    | Vasorin            |
| 58     | CCR8            | 131    | FGF R3         | 204    | HRG-alpha          | 277    | IL-17D          | 350    | MIP-3 beta   | 423    | SDP-1           | 496    | VCAM-1             |
| 59     | CCR9            | 132    | FGF R4         | 205    | HRG-beta 1         | 278    | IL-17E          | 351    | MMP-1        | 424    | sFRP-1          | 497    | VE-Cadherin        |
| 60     | CD14            | 133    | FGF R5         | 206    | HVEM               | 279    | IL-17F          | 352    | MMP-2        | 425    | sFRP-3          | 498    | VEGF               |
| 61     | CD27            | 134    | FGF-4          | 207    | I-SOB              | 280    | IL-17R          | 353    | MMP-3        | 426    | sFRP-4          | 499    | VEGF R2            |
| 62     | CD30            | 135    | FGF-5          | 208    | ICAM-1             | 281    | IL-17RC         | 354    | MMP-7        | 427    | sgp130          | 500    | VEGF R3            |
| 63     | CD30 Ligand     | 136    | FGF-6          | 209    | ICAM-2             | 282    | IL-17RD         | 355    | MMP-8        | 428    | SigIRR          | 501    | VEGF-R             |
| 64     | CD40            | 137    | FGF-7          | 210    | ICAM-3             | 283    | IL-18 Rpa       | 356    | MMP-9        | 429    | Siglec-5        | 502    | VEGF-C             |
| 65     | CD40 Ligand     | 138    | FGF-8          | 211    | ICAM-5             | 284    | IL-18 R alpha   | 357    | MMP-10       | 430    | Siglec-9        | 503    | VEGF-D             |
| 66     | CD 163          | 139    | FGF-9          | 212    | IFN-alpha/beta R1  | 285    | IL-18 R beta    | 358    | MMP-11       | 431    | SLP1            | 504    | VEGI               |
| 67     | Cerberus 1      | 140    | FGF-10         | 213    | IFN-alpha/beta R2  | 286    | IL-19           | 359    | MMP-12       | 432    | Smad 1          | 505    | WIF-1              |
| 68     | Chem R23        | 141    | FGF-11         | 214    | IFN-beta           | 287    | IL-20           | 360    | MMP-13       | 433    | Smad 6          | 506    | WISP-1             |
| 69     | Chordin-Like 1  | 142    | FGF-12         | 215    | IFN-gamma          | 288    | IL-20 R alpha   | 361    | MMP-14       | 434    | Smad 5          | 507    | XEDAR              |
| 70     | Chordin-Like 2  | 143    | FGF-13 1B      | 216    | IFN-gamma R1       | 289    | IL-20 R beta    | 362    | MMP-15       | 435    | Smad 7          |        |                    |
| 71     | Csk             | 144    | FGF-16         | 217    | IGFBP-1            | 290    | IL-21           | 363    | MMP-16       | 436    | Smad 8          |        |                    |
| 72     | CLC             | 145    | FGF-17         | 218    | IGFBP-2            | 291    | IL-21 R         | 364    | MMP-19       | 437    | Prdx6           |        |                    |
| 73     | CNTF            | 146    | FGF-18         | 219    | IGFBP-3            | 292    | IL-22           | 365    | MMP-20       | 438    | Soggy-1         |        |                    |

RayBiotech Label-Based (L-Series) Human L507 Array Membrane Kit: Antibody array target list.

**Figure S2. Additional angiograms of the porcine MI model to highlight anatomical consistency.**

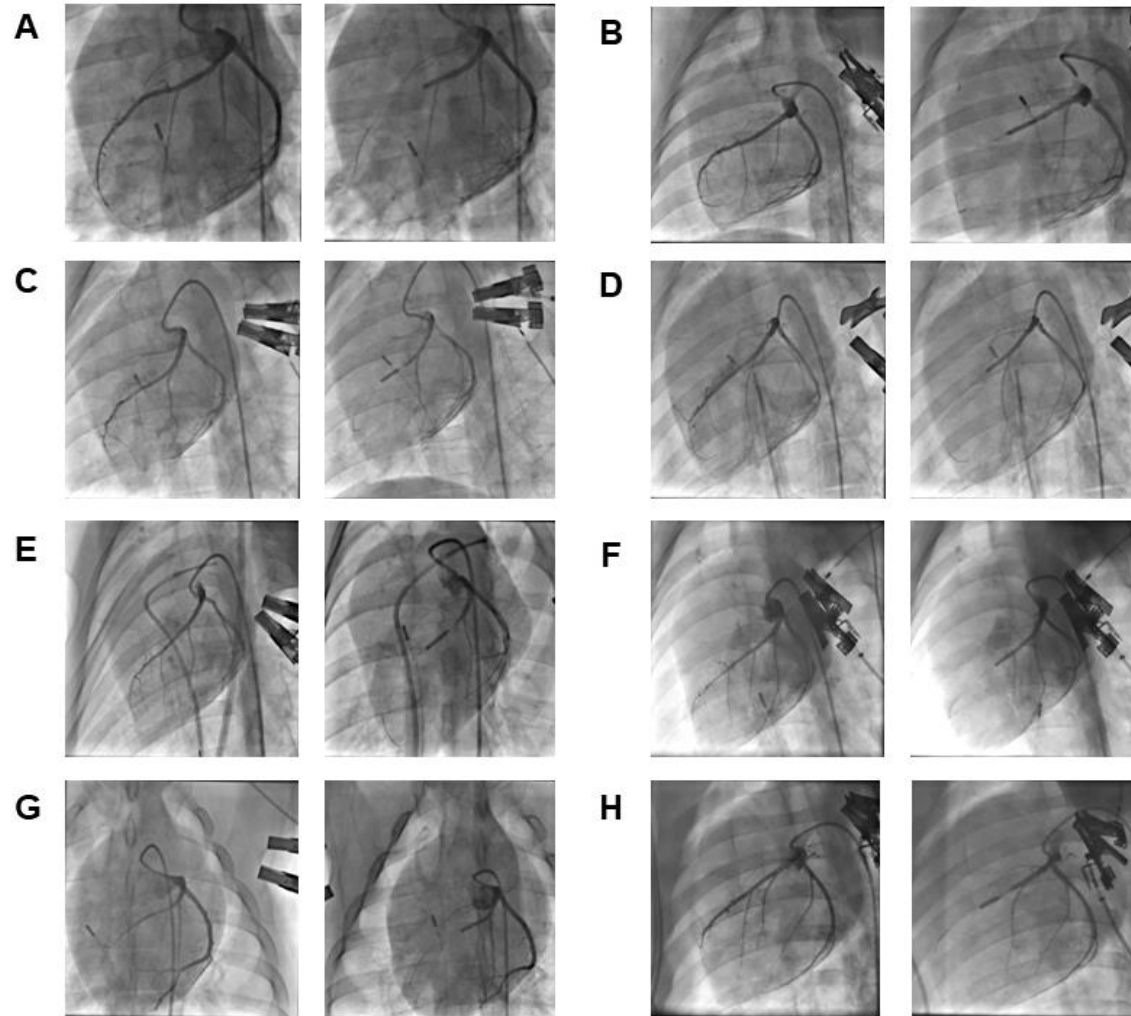

**(A-H)** Images displayed at baseline (left panels) and following balloon inflation distal to the first diagonal branch of the LAD (right panels). MI, myocardial infarction; LAD, left anterior descending.

**Figure S3. Structural Comparison of Human and Porcine TNF- $\alpha$  using ChimeraX (University of California, San Francisco) and BLAST (NCBI, Bethesda, MD).**

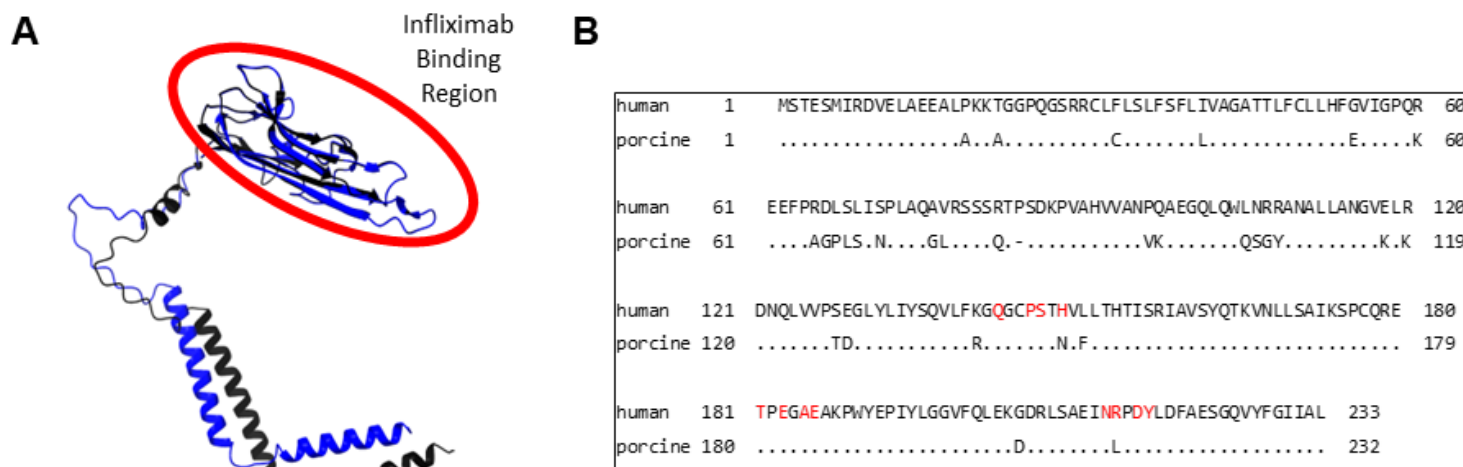

(A) Alpha fold was used to predict the three-dimensional structure of both human (AF-P01375-F1) and porcine (AF-P23563-F1) TNF- $\alpha$ . Matchmaker was used within ChimeraX to align the two structures. (B) BLAST was used to align the two sequence and determine homology of antigenic residues of TNF- $\alpha$  involved in Infliximab binding. Residues interacting with Infliximab are displayed in red. Method: Compositional matrix adjust. Identities:202/233(87%), Positives:215/233(92%), Gaps:1/233(0%).

Figure S4. Protein data distribution density curves.

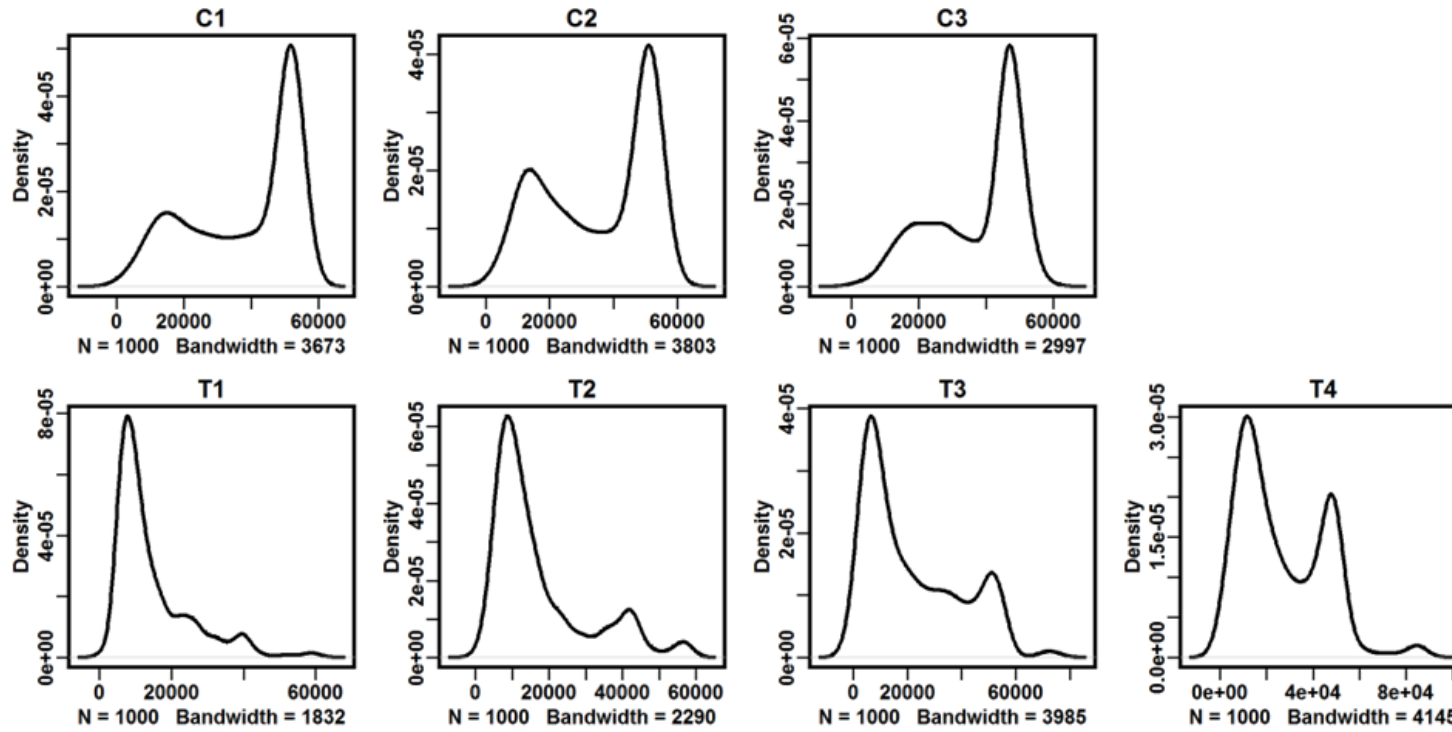

Protein data distribution density curves highlighting the difference between control (top row) and treated samples (bottom row).

**Figure S5. Protein array data in control and treated porcine coronary sinus samples collected from the great cardiac vein at 3-days postinfarction.**

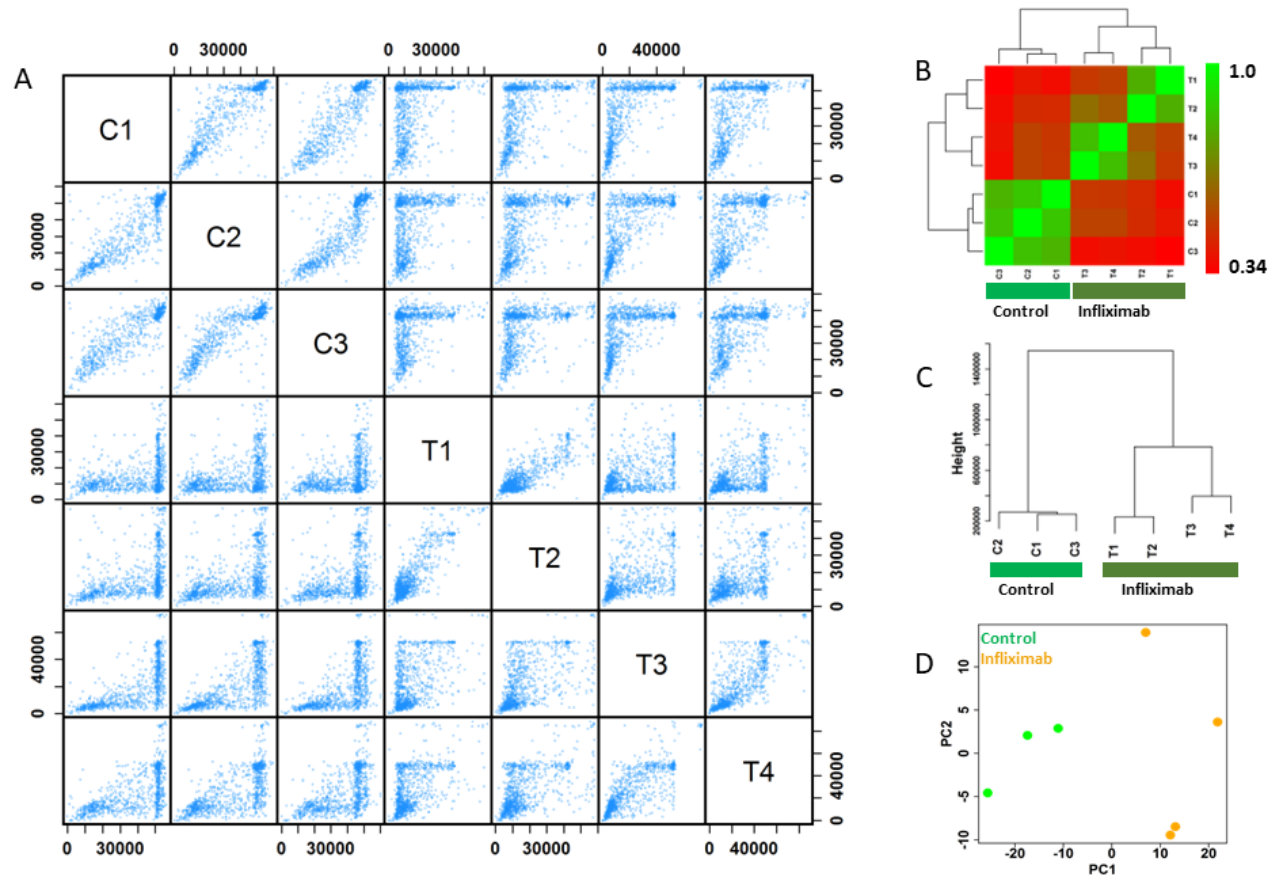

**(A)** Correlation scatter plot of protein data in control and treated samples. **(B)** Principal component analysis based on all protein expression profiles reveals a good separation of control and treated samples. **(C)** Hierarchical clustering highlights the difference between control and treated groups. **(D)** Correlation heatmap confirms the difference between Treated and Control and similarity within each group.



**Figure S6. Coronary aspirate differentially expressed proteins.**

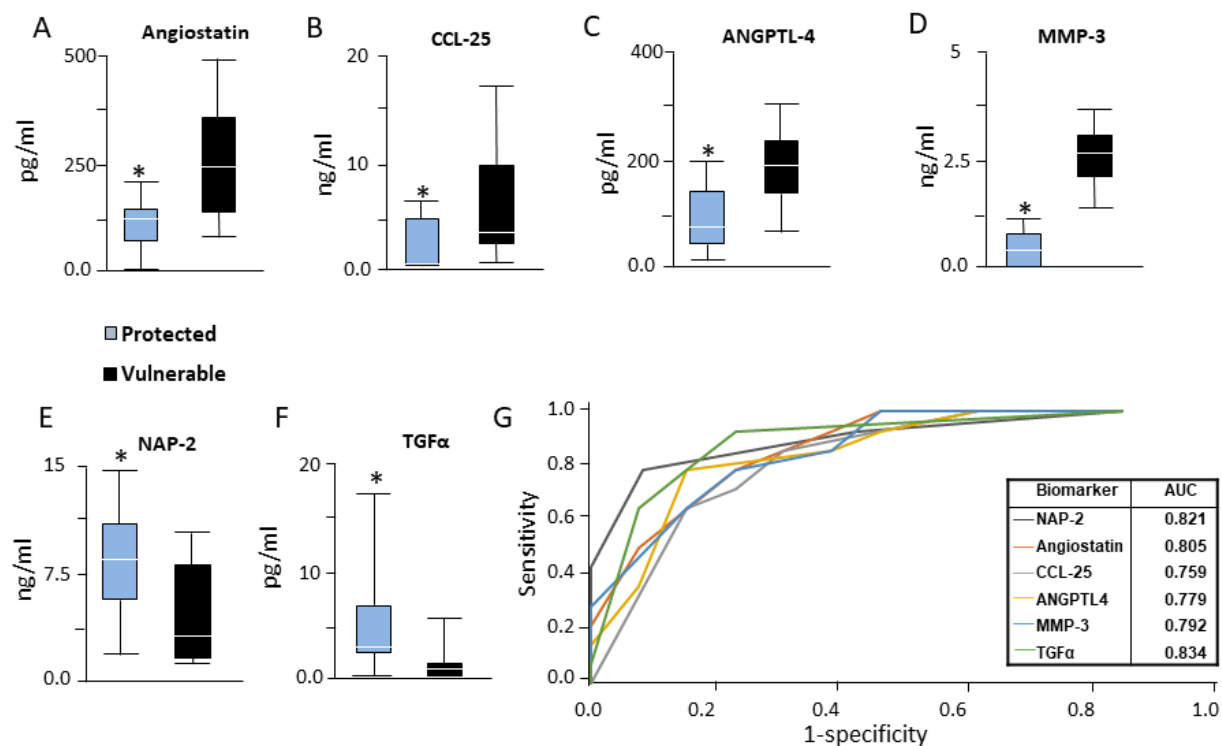

Top 6 differentially expressed proteins in the coronary aspirate samples are delineated with (A) Angiostatin, (B) Chemokine ligand 25 (CCL-25), (C) Angiopoietin like-4 (ANGPTL-4), and (D) Matrix metalloproteinase-3 (MMP-3), all significantly upregulated in vulnerable. (E) Neutrophil Activating Peptide-2 (NAP-2) and (F) Transforming Growth Factor alpha (TGF $\alpha$ ) significantly downregulated in vulnerable. (G) Corresponding receiver operating characteristic curve (ROC) for each of the biomarkers provided, showing a high degree of correspondence with outcomes.

**Figure S7. Differential expressed proteins involved in the top 10 enriched function pathways.**

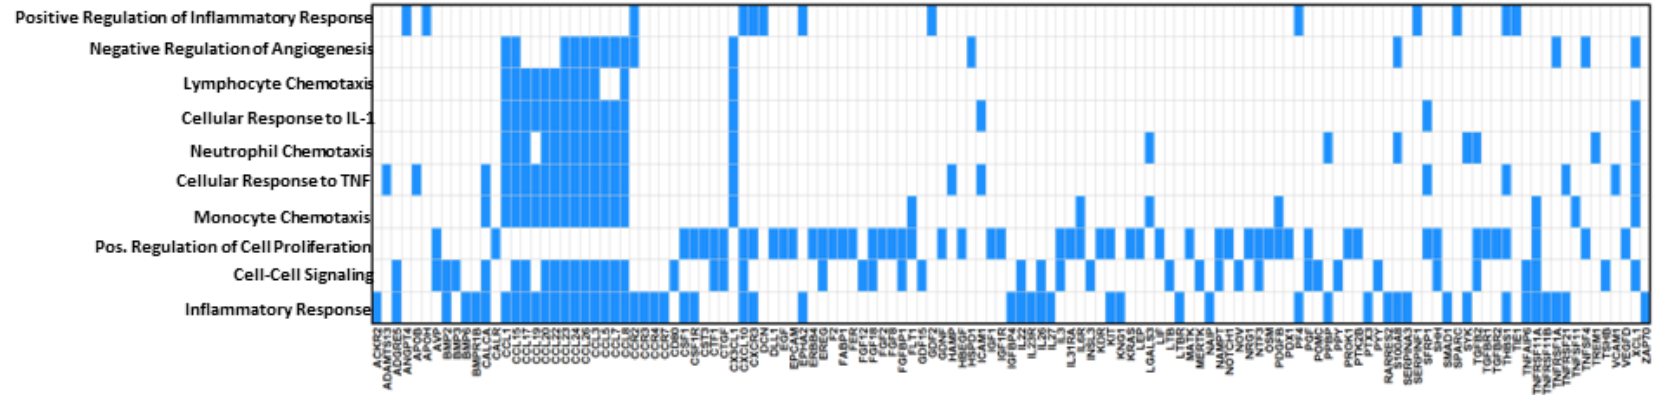

Individual genes involved in top 10 pathways. Overlapped genes are in charge of the crosstalk between different pathways.

**Figure S8. Heat map.**

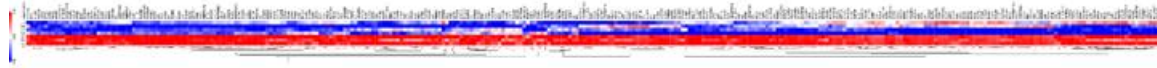

Heatmap of 323 significantly differential proteins obtained from coronary sinus blood 3 days after myocardial infarction in infliximab-treated (n=4) and control (n=3) cohorts.

**Figure S9. Representative histological cross sections.**

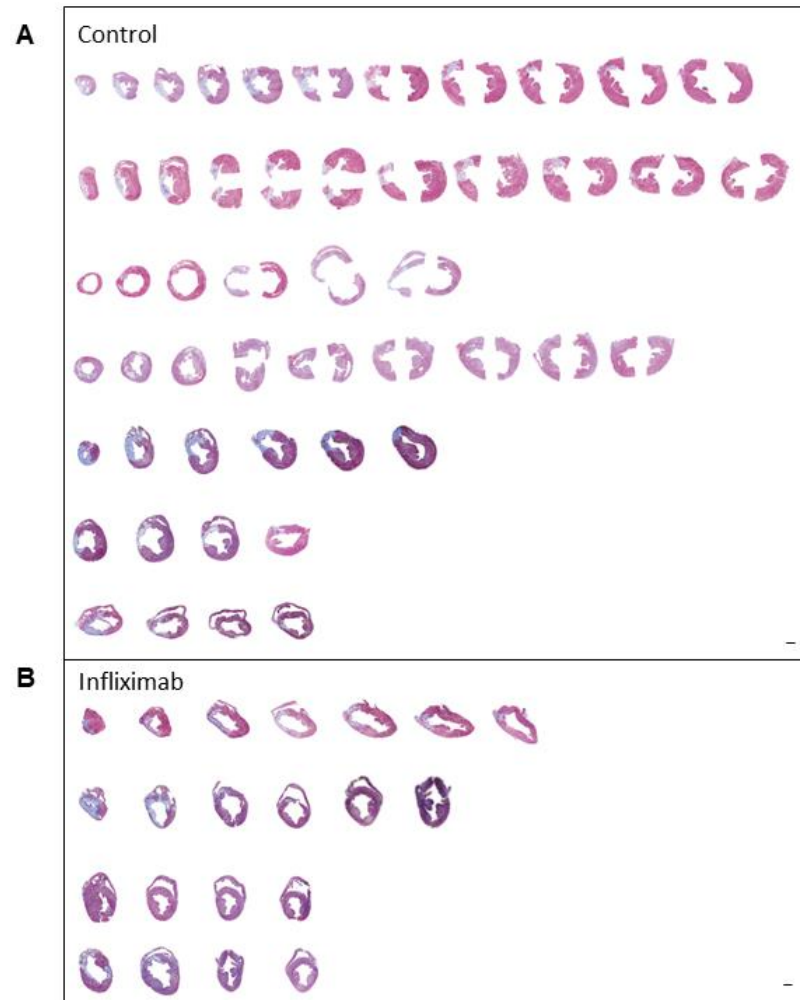

Additional representative histological cross-sections of pig hearts 4-weeks post infarction stained with Masson's Trichrome to visualize collagen (blue) and myocardium (red/purple) in (A) Control (n=7) and (B) Infliximab-treated (n=4) cohorts. Scale bar represents 10 mm.

## **Supplemental Video Legends:**

**Video S1. Structural Comparison of Human and Porcine TNF- $\alpha$ .** 3D reconstruction of the TNF $\alpha$  comparing human versus porcine structure and its infliximab binding region as defined in Figure S3. Best viewed with Windows Media Player.

**Video S2. Reconstruction of untreated porcine heart.** 3D reconstruction of hearts using serial cross-sectional histology documents a larger scar territory in the untreated porcine hearts versus those treated with infliximab. Cross sectional short axis images were digitally superimposed (26 slices for untreated heart) and given a 5 mm dimensional digital width in the Zeiss Zen software. Blue represents collagen and red muscle as per the Masson's trichome staining pattern. Digitized images were rendered as a z-stack and a movie was generated from manipulation of the z-stacked image. Best viewed with Windows Media Player.

**Video S3. Reconstruction of infliximab-treated porcine heart.** 3D reconstruction of hearts using serial cross-sectional histology documents a smaller scar territory in the hearts treated with infliximab versus in the untreated porcine hearts. Cross sectional short axis images were digitally superimposed (20 slices for infliximab treated heart) and given a 5mm dimensional digital width in the Zeiss Zen software. Blue represents collagen and red muscle as per the Masson's trichome staining pattern. Digitized images were rendered as a z-stack and a movie was generated from manipulation of the z-stacked image. Best viewed with Windows Media Player.
